# Supplementary material for: Hydroethanolic Extracts of Erigeron floribundus and Azadirachta indica Reduced Plasmodium berghei Parasitemia in Balb/c Mice
Source: Hindawi journal article supplement (doi:10.1155/2018/5156710), 2018-01-01
Supplement: f1 [file 5156710.f1.pdf]

## SUPPLEMENTARY MATERIALS

### 1- Plants used in the treatment of malaria in Dibbi locality

| Family        | Plant name                                   | Local name (fufuldé) | Part use      | Growth form | Mode of preparation      | Number of respondents | Other diseases treated                            |
|---------------|----------------------------------------------|----------------------|---------------|-------------|--------------------------|-----------------------|---------------------------------------------------|
| Asteraceae    | <i>Bidens pilosa</i> Linn. Var. Radita       | Nyakamre             | leaves        | Herb        | Maceration               | 5                     | Hypertension, Typhoid                             |
| Asteraceae    | <i>Erigeron floribundus</i> (Kunth) Sch.Bip. | Guéné hadhi          | leaves        | Herb        | Maceration               | 2                     | Typhoid                                           |
| Verbenaceae   | <i>Lantana camara</i> L.                     | /                    | leaves        | shrub       | Decoction                | 5                     | Typhoid                                           |
| Amaranthaceae | <i>Achyranthes aspera</i> L.                 | Saille doho          | leaves        | herb        | Maceration/<br>Decoction | 2                     | Nerve sickness                                    |
| Meliaceae     | <i>Azadirachta indica</i> A. Juss            | Gagne                | leaves, fruit | tree        | Decoction                | 15                    | Yellow fever, AIDS, abdominal pains, hepatitis    |
| Caesalpiaceae | <i>Tamarindus indica</i>                     | Djabbe               | leaves, bark  | tree        | Decoction                | 12                    | Filariasis                                        |
| Caesalpiaceae | <i>Senna occidentalis</i> L.                 | Kaccu-kaccunga       | leaves, seed  | shrub       | Decoction                | 10                    | Typhoid, yellow fever, abdominal pains, hepatitis |
| Rubiaceae     | <i>Spermacoce stachydea</i> de C.            | /                    | leaves, root  | herb        | Decoction                | 2                     | Analgesic                                         |
| Liliaceae     | <i>Aloe vera</i> (L.) Burm.F.                | /                    | leaves        | herb        | Maceration               | 2                     | Helminthiasis, dermatosis, typhoid                |
| Caricaceae    | <i>Carica papaya</i> L.                      | Dukudjee             | leaves, root  | tree        | Maceration/<br>Decoction | 10                    | Typhoid, tooth decay                              |
| Myrtaceae     | <i>Eucalyptus sp</i>                         | /                    | leaves, bark  | tree        | Decoction                | 8                     | Typhoid                                           |

**2- Behavioural observations of acute toxicity study with *Erigeron floribundus* and *Azadirachta indica***

| Dose<br>(mg/kg)                   | Time of observation |           |         |          |           |          |
|-----------------------------------|---------------------|-----------|---------|----------|-----------|----------|
|                                   | 0 - 30 min          | 1/2 - 2 h | 2 - 4 h | 4 - 24 h | 24 - 48 h | 2 - 14 j |
| <b>(A) Mice treated with HEEF</b> |                     |           |         |          |           |          |
| <b>Control</b>                    | sleep               | RAS       | RAS     | RAS      | RAS       | RAS      |
| <b>2000</b>                       | sleep               | sleep     | sleep   | RAS      | RAS       | RAS      |
| <b>5000</b>                       | sleep               | sleep     | sleep   | RAS      | RAS       | RAS      |
| <b>(B) Mice treated with HEAI</b> |                     |           |         |          |           |          |
| <b>Control</b>                    | sleep               | RAS       | RAS     | RAS      | RAS       | RAS      |
| <b>2000</b>                       | sleep               | sleep     | RAS     | RAS      | RAS       | RAS      |
| <b>5000</b>                       | sleep               | sleep     | RAS     | RAS      | RAS       | RAS      |

RAS = Nothing to report

HEAI : hydroethanolic extracts of *Azadirachta indica*; HEEF : hydroethanolic extracts of *Erigeron floribundus*
